# Supplementary material for: Composites of plasma treated poly(etherimide) films with gold nanoparticles and lysine through layer by layer assembly: a “friendly-rough” surface for cell adhesion and proliferation for tissue engineering applications
Source: Royal Society of Chemistry journal article supplement (doi:10.1039/b817231e), 2008-12-12
Supplement: b817231e.pdf [file b817231e.pdf]

**Electronic Supporting Information**

**Composites of plasma treated poly(etherimide) films with gold nanoparticles and lysine through layer by layer assembly : A “Friendly-Rough” surface for cell adhesion and proliferation for tissue engineering applications**

V. D’Britto, S. Tiwari, V. Purohit, P. P. Wadgaonkar, S.V. Bhoraskar, R.R. Bhonde and B.L.V. Prasad

**ESI- Figure 1**

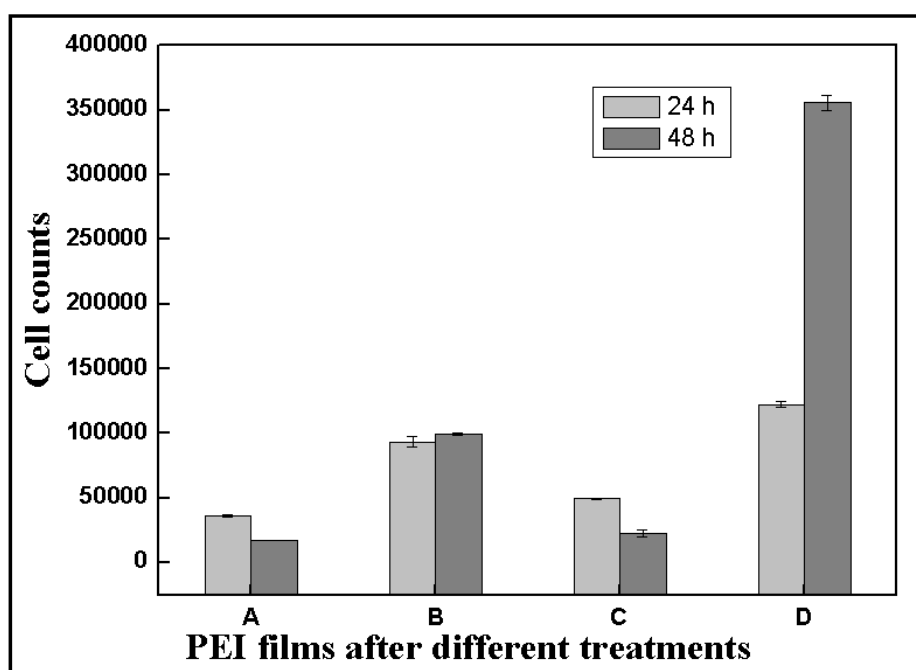

ESI-Fig. S1: Statistical data representing the number of cells present on (A) untreated PEI film, (B) plasma treated PEI film, (C) plasma treated PEI film incubated with GNPs for 6h and (D) plasma treated PEI film incubated with GNPs for 6h and thereafter with lysine.
